# Supplementary material for: Cross-species transmission of an ancient endogenous retrovirus and convergent co-option of its envelope gene in two mammalian orders
Source: PubMed Central journal article supplement (PMC9604959; doi:10.1371/journal.pgen.1010458), 2022-10-14

**A**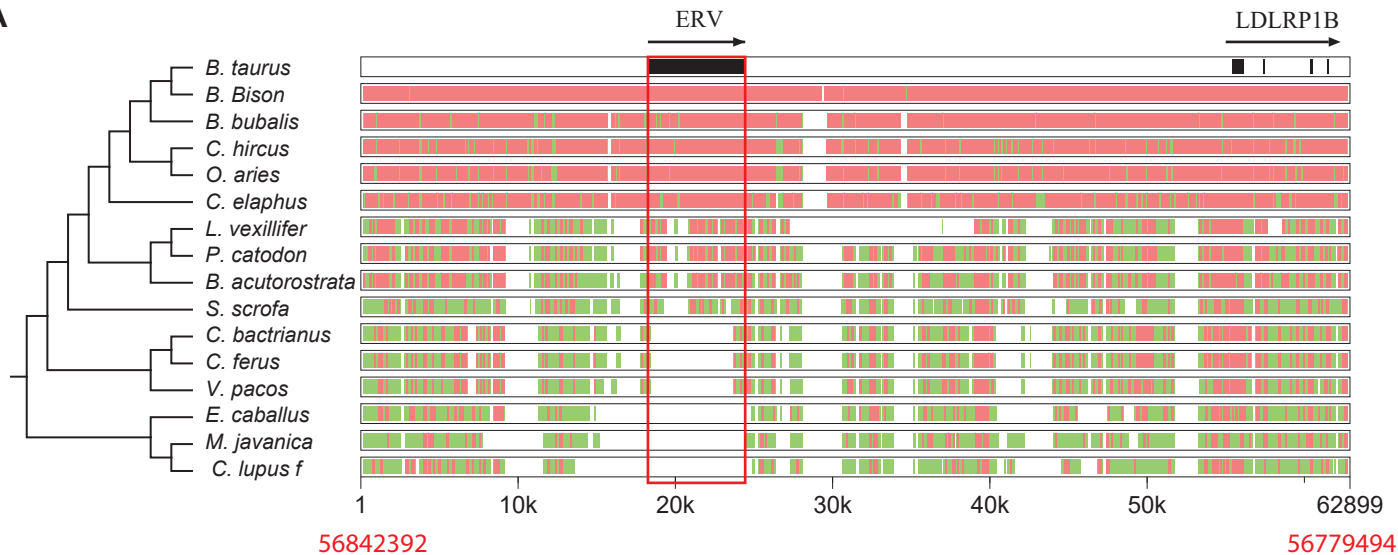**B**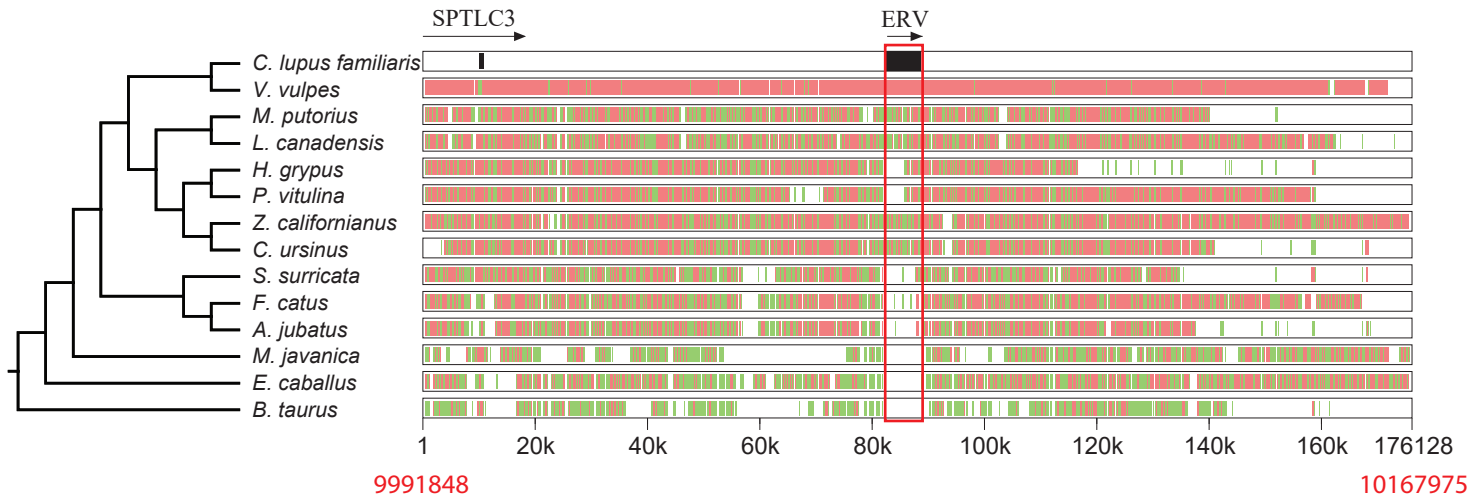

Supplement: pgen.1010458.s010.pdf [file pgen.1010458.s010.pdf]
