# Supplementary material for: Cross-species transmission of an ancient endogenous retrovirus and convergent co-option of its envelope gene in two mammalian orders
Source: PubMed Central journal article supplement (PMC9604959; doi:10.1371/journal.pgen.1010458), 2022-10-14
Supplement: pgen.1010458.s016.pdf [file pgen.1010458.s016.pdf]

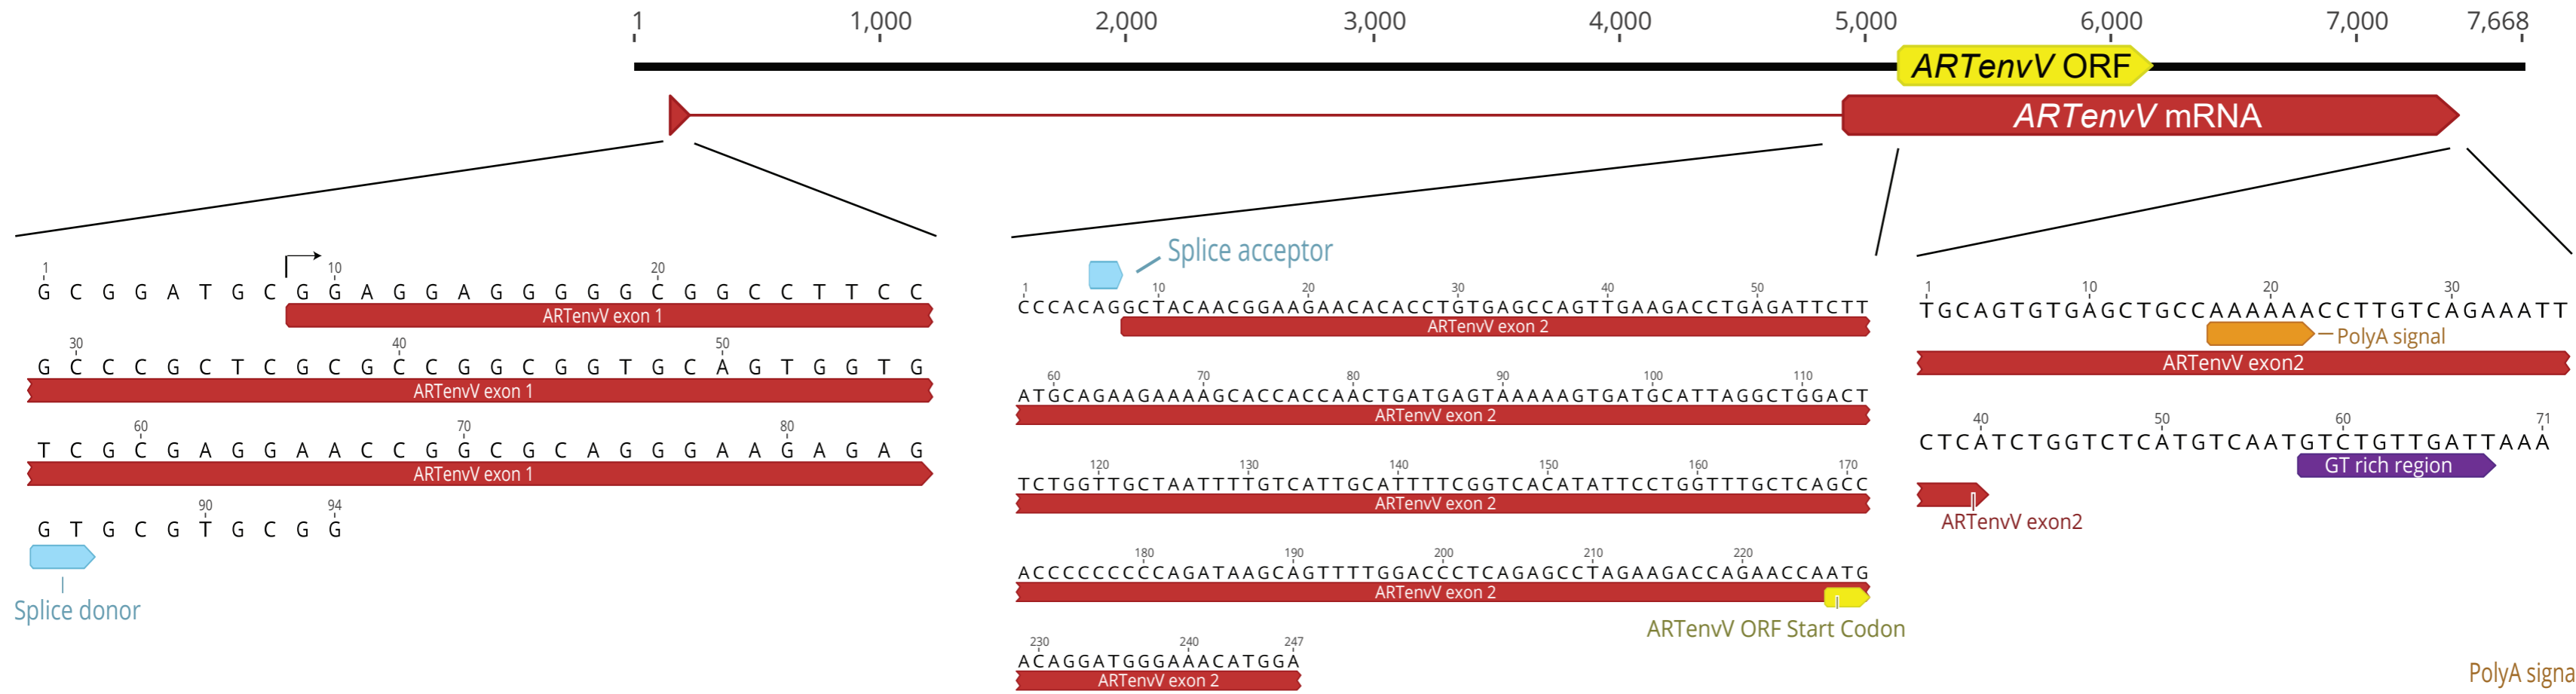

**1. B. taurus** GGAGGAGGGGGCGGCCTTCCGCCCGCTCGCGCCGGCGGTGCAGTGGTGTGCGGAGGAACCGGCGCAGGGAAGAGAG  
**ARTenvV exon 1**

**2. O. dammah** .....

**3. O. aries** .....A.....

**4. C. hircus** G·TG·····A·····

**5. O. hemionus** ····C····G····G·····TA·····A·····

**6. S. scrofa** GCGCCGC·GA···A····GTGG·TT·T·A·AG····G···A·C··G·C··C·····C···C····T···CA····

**1. B. taurus** TTTGCCTTTCTTCCCTTGTGCTGCAGTGTGAGCTGCC-AAAAAACCTTGTGAGAAATTCTCA  
**ARTenvV exon 2**

**2. O. dammah** C·····G·····CC····T·····G·····G····

**3. C. hircus** C·····G·····T·····CC····T·····TG·····

**4. O. aries** C·····G·····CC····T·····TG·····A····

**5. O. hemionus** C·····G·····A·····CC·T··T·····

**6. S. scrofa** C·C·····CA···CC·TG·T··G··G··T····G····
