# Supplementary material for: Cross-species transmission of an ancient endogenous retrovirus and convergent co-option of its envelope gene in two mammalian orders
Source: PubMed Central journal article supplement (PMC9604959; doi:10.1371/journal.pgen.1010458), 2022-10-14
Supplement: pgen.1010458.s017.pdf [file pgen.1010458.s017.pdf]

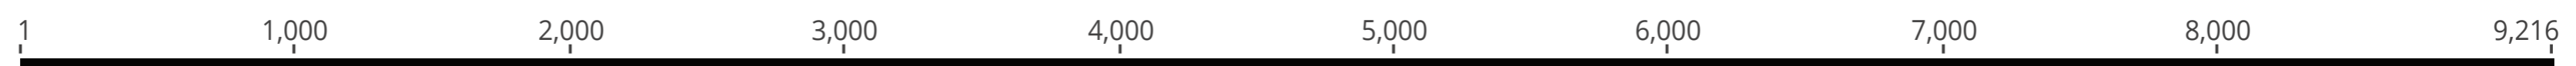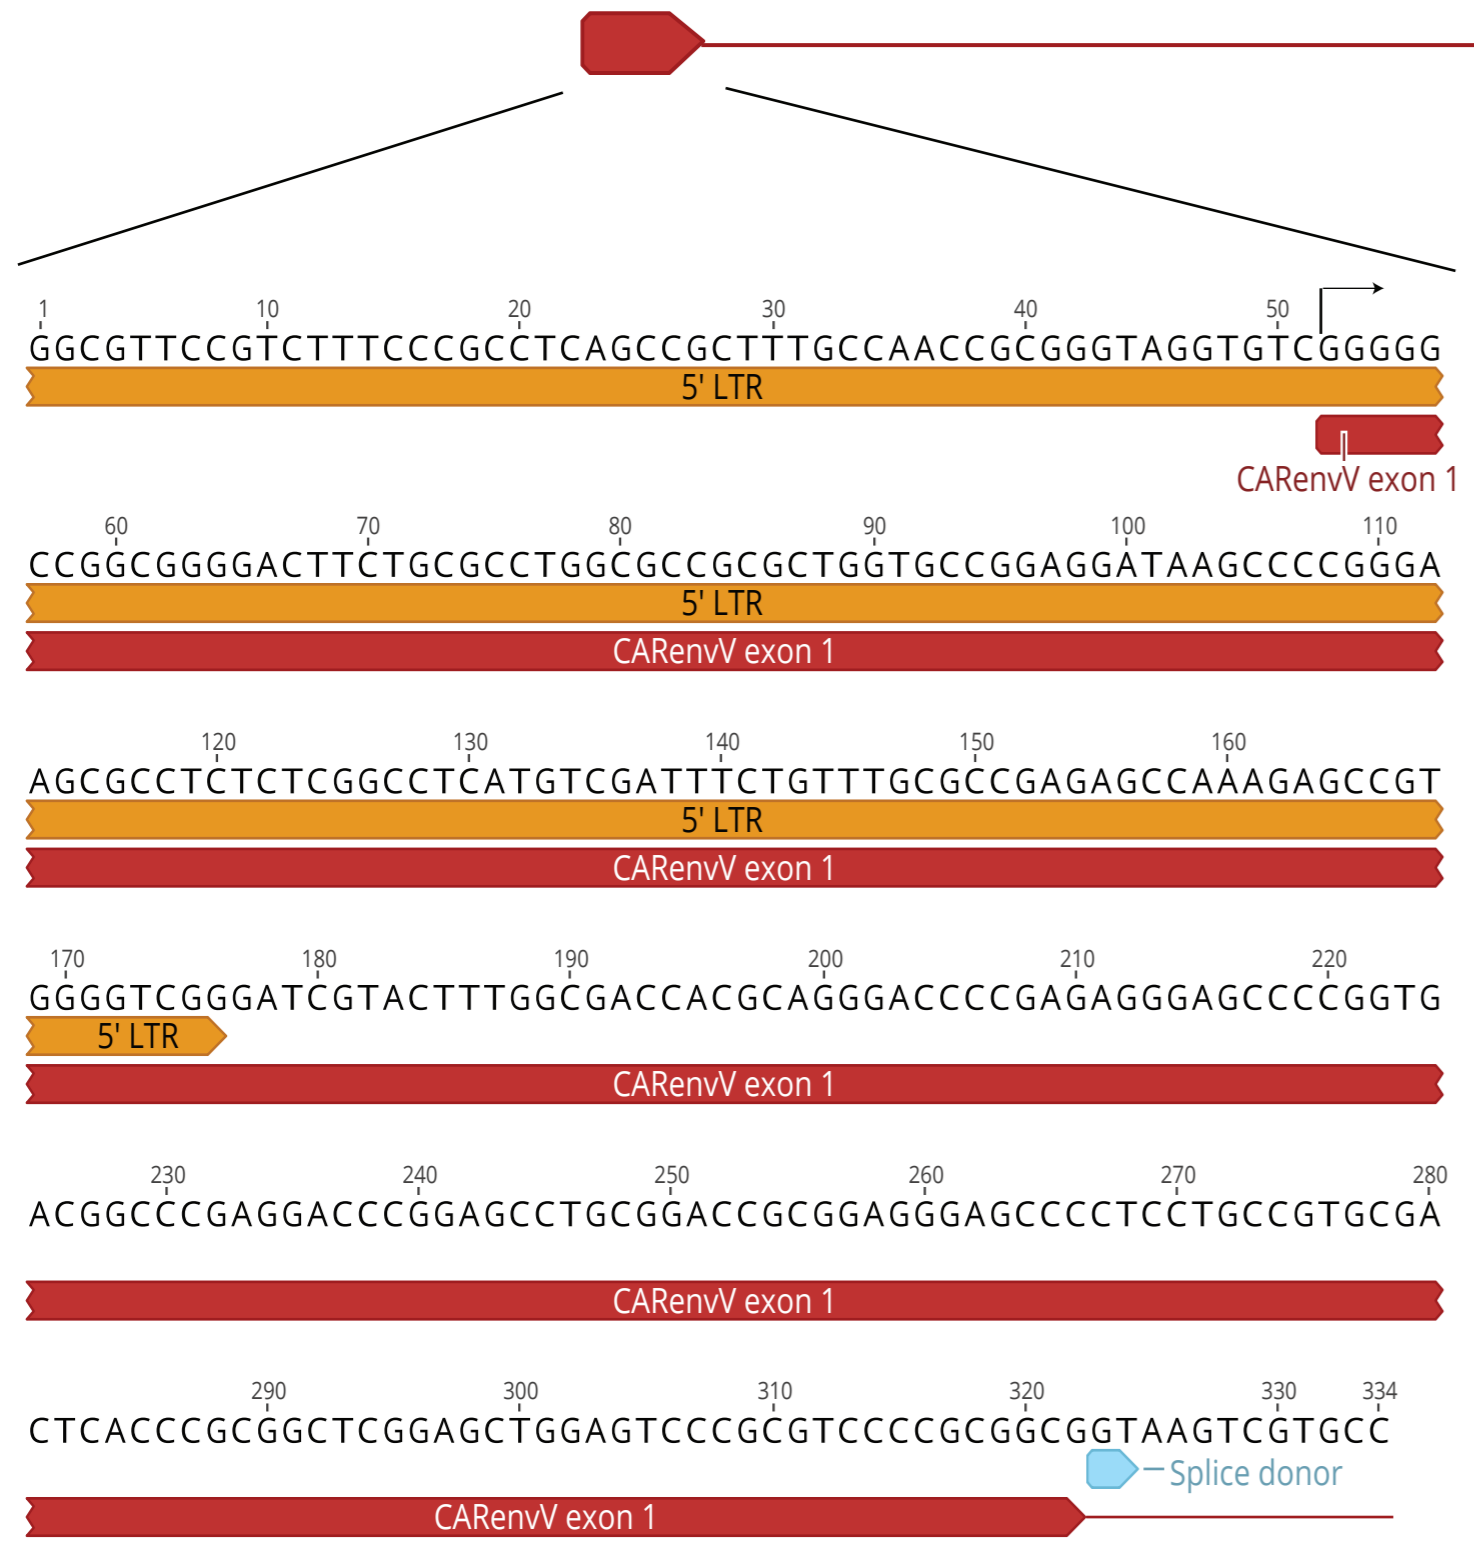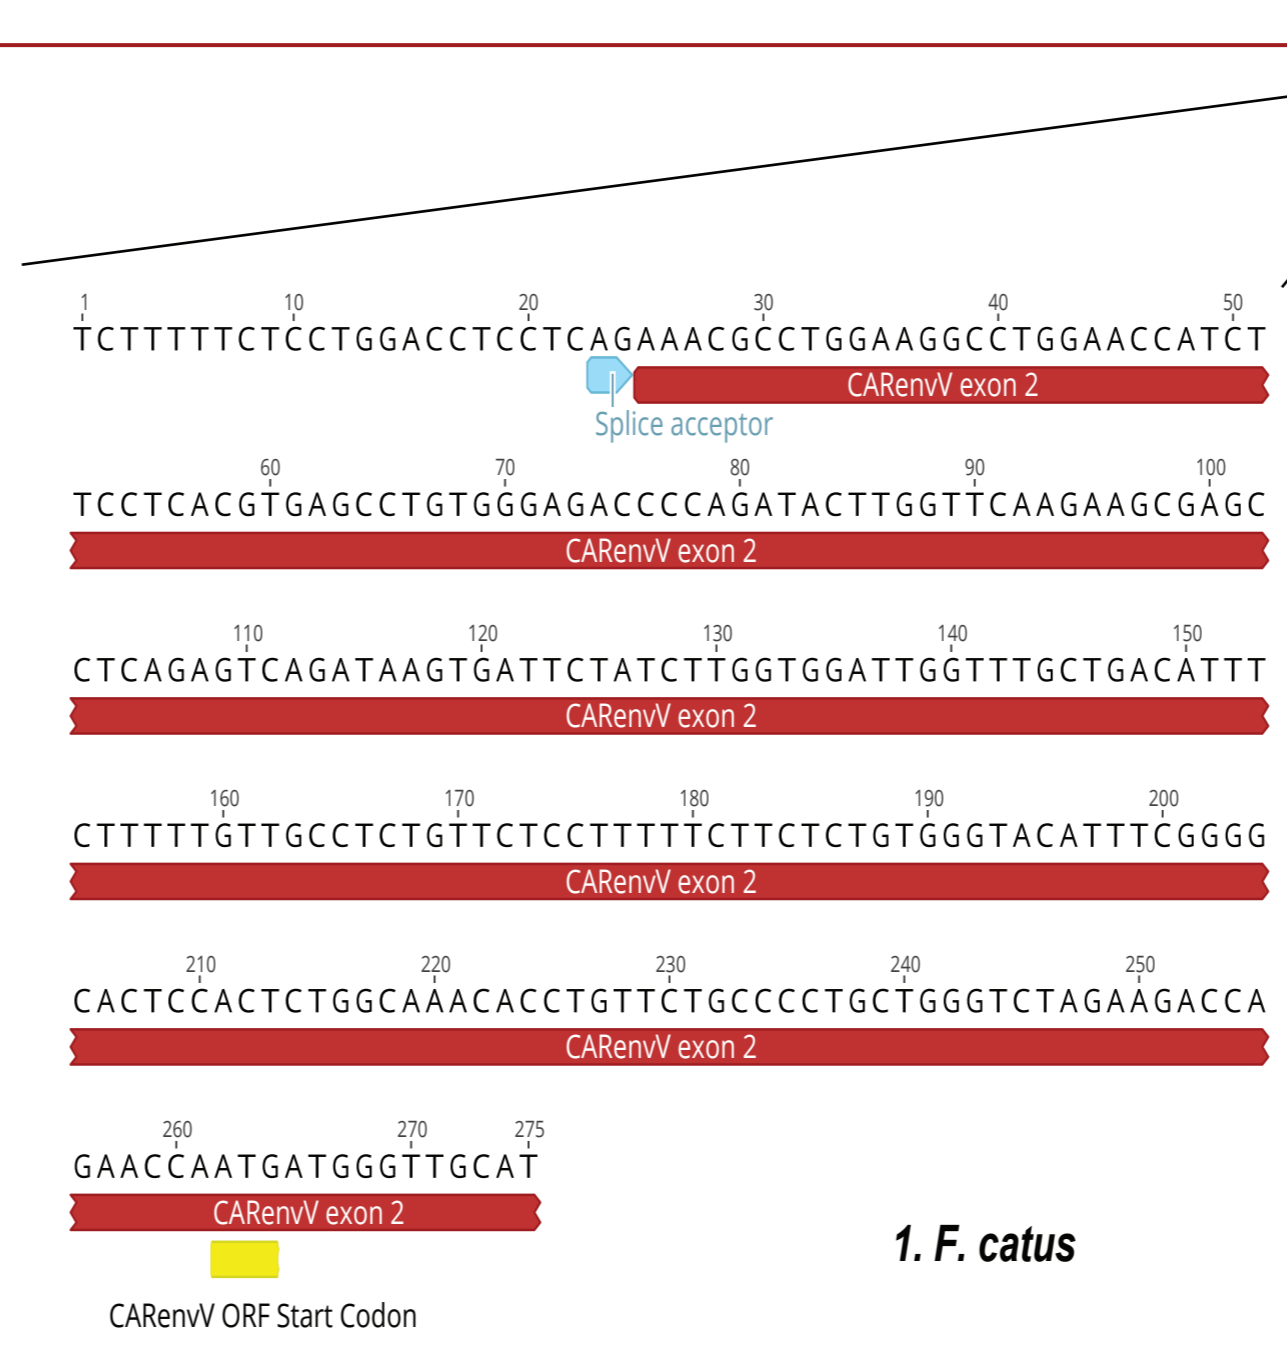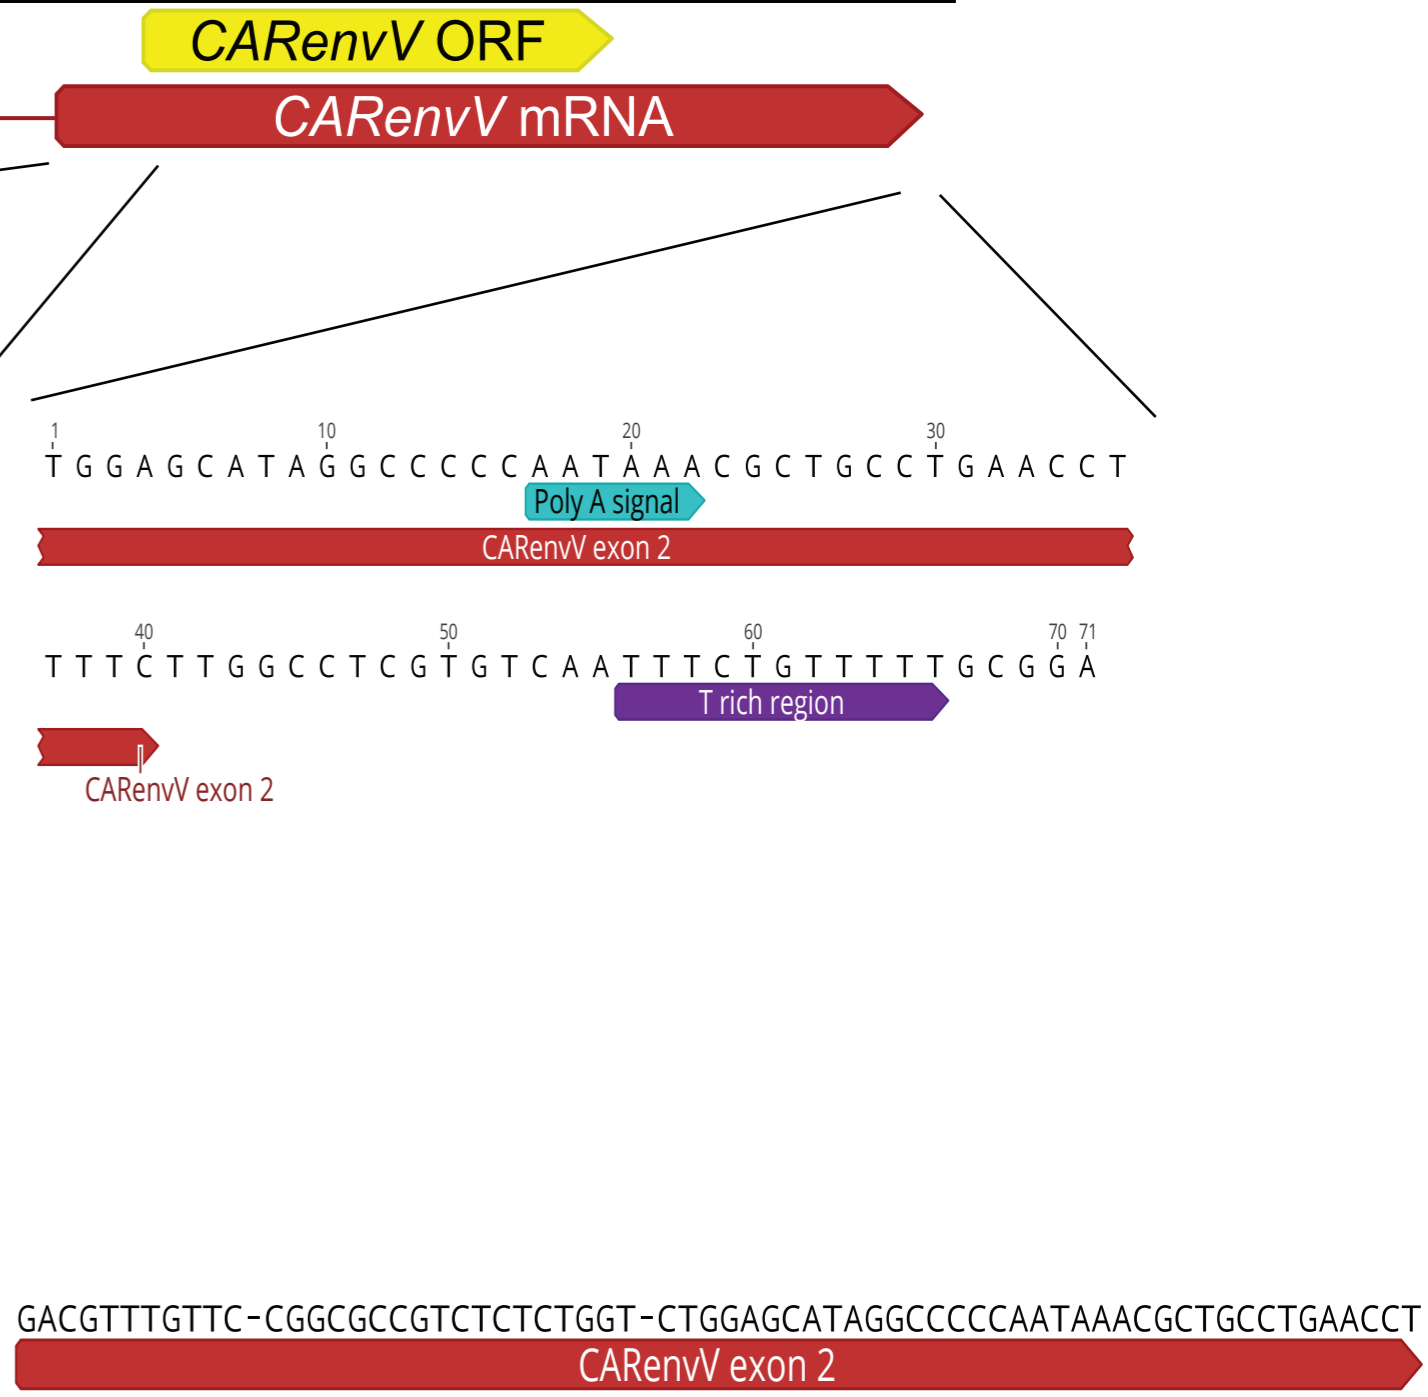

1. *F. catus*  
 GGGGGCCGGGGGACTTCTGCGCCTGGCGCCGCTGGTGCCGGAGGATAAGCCCCGGAA-----GCGCCTCTCTGGCCTCATGTCGATTCT

2. *C. lupus familiaris*  
 ..AG.....C....TC.GC.C-----C

3. *U. cinereoargenteus*  
 G.GC....

4. *N. vison*  
 CTTGCAGAGCGCCGGGTTTCG.TC.....C.C....G.T.CA.CT-----GC....A.T.ACGTGCC.ATT.T....A.T.....AG.....

5. *M. putorius furo*  
 CTTGCAGAGCGCCGGTTCGC.A.....C.C.....T.CA.TCT-----G....A.T.ACGTGCC.ATT.T....A.T....C.AG.....

6. *C. obscurus*  
 ..A.A.CC.G.GCA.C.T-----G-----C.G.G.G.C.G....G....

- 1. *F. catus*
- 2. *C. lupus familiaris*
- 3. *N. vison*
- 4. *M. putorius furo*
- 5. *U. cinereoargenteus*
- 6. *C. obscurus*

GACGTTTGTTC-CGGCGCCGTCTCTCTGGT-CTGGAGCATAGCCCCCAATAAACGCTGCCTGAACCT

.....C.A.C.C.T.G....C.C.....CT.....AA.....A.G.....T.T.

..G.C.....C.T.T.C....C.....A...G...GA...T.....A.C...A.T..

..G.C.....C.A.T.T.C....C.....A.G.G...GA...T.....A.C...A.T..

.....C.A.C.C.T.G....C.C.....CT.....AA.....A.G.....T.T.

.....G.C.C.GT.....T.C.C.C.....G....C.....A.....A...TTG
